# Supplementary material for: Adjustment of Cell-Type Composition Minimizes Systematic Bias in Blood DNA Methylation Profiles Derived by DNA Collection Protocols
Source: PLoS One. 2016 Jan 22;11(1):e0147519. doi: 10.1371/journal.pone.0147519 (PMC4723336; doi:10.1371/journal.pone.0147519)
Supplement: S1 Table — (XLSX) [file pone.0147519.s010.xlsx]

## Sheet: Table S1
S1 Table. DNA collection protocols among major cohorts and biobanks in Japan
Cohort/Biobank	Blood collection			Pre-process				DNA extraction
	Anticoagulant	Vol. collected (mL)	Transport	Time to process	Centrifugation	Separation of buffy coat	Storage of buffy coat	Blood cell fraction used	DNA extraction kit (Supplier)	Vol. used	Elution volume	Storage
Tohoku Medical Megabank (Iwate)	EDTA-2Na	7	4°C, 16 h	≤24 h	2300 × g, 10 min, 4°C	BC 490 µL (Automatic)	−80°C	Buffy coat	Autopure LS (Qiagen)	490 µL	350 µL	4°C
JPHC	Heparin sodium	10	-	≤12 h	10 min	BC 1–1.5 mL (Manual)	−80°C	Buffy coat	FlexiGene DNA Kit (Qiagen)	300 µL	200–500 µL	−80°C
JPHC-NEXT	EDTA-2Na	7	-	≤12 h	10 min	BC 1 mL (Manual)	−80°C	Buffy coat	FlexiGene DNA Kit (Qiagen)	300 µL	200–500 µL	−80°C
Hisayama	EDTA-2Na	10	−80°C	-	-	-	−80°C	Whole blood	QIAamp DNA Blood Maxi Kit (Qiagen)	10 mL	1.5 mL	−80°C
BBJ (SRL Corporation*)	EDTA-2Na	7	1–15°C	4°C, ≤4 days	760 × g, 10 min, 4°C	BC 0.5–1.5 mL (Manual)	-	Buffy coat	Genomix (Talent)	0.5–1.5 mL	Adjust to 100 ng/μL	4°C
BBJ (BML Corporation*)	EDTA-2Na	7			-	-	-	Whole blood	Gentra Puregene Blood Kit/Autopure (Qiagen)	7 mL		4°C
BBJ (LSI Medience Corporation*)	EDTA-2Na	7			-	-	-	Whole blood	Wizard Genomic DNA Purification Kit (Promega)	7 mL		4°C
J-MICC (Saga University)	EDTA-2Na	7	4°C, 30 min	≤1.5 h	1610 × g, 10 min, 4°C	BC (Manual)	−80°C	Buffy coat	-	-	-	-
J-MICC (Chiba Cancer Center)	EDTA-2Na	7	4°C, 1 h	≤3 h	1581 × g, 10 min, 4°C	BC (Manual)	−80°C	Buffy coat	-	-	-	-
J-MICC (Kagoshima University)	EDTA-2Na	7	4°C, 30 min	≤6 h	1200 × g, 10 min, RT	BC (Manual)	−80°C	Buffy coat	QIAamp DNA Blood Midi Kit (Qiagen)	50 µL	200 µL	−80°C
J-MICC (University of Shizuoka 1)	EDTA-2Na	7	4°C, 12–14 h	≤ 24 h	1200 × g, 10 min, 4°C	BC (Manual)	−80°C	Buffy coat	QIAamp DNA Blood Midi Kit (Qiagen)	200 µL	200 µL	−80°C
J-MICC (University of Shizuoka 2)	EDTA-2Na	7	4°C, 3 h	≤10 h	1200 × g, 10 min, 4°C	BC (Manual)	−80°C	Buffy coat	QIAamp DNA Blood Midi Kit (Qiagen)	200 µL	200 µL	−80°C
J-MICC (Shiga University of Medical Science)	EDTA-2Na	7	4°C, 30 min	≤4 h	3000 × g, 10 min, 4°C	BC (Manual)	−80°C	Buffy coat	-	-	-	-
J-MICC (Kyoto Prefectural University of Medicine)	EDTA-2Na	7	4°C, ≤3 h	≤24 h	-	-	−80°C	Whole blood	-	-	-	-
J-MICC (Kyushu University KOPS 1)	EDTA-K2	6	4°C, 16 h	-	1500 × g, 10 min, RT	-	−80°C	Whole blood	NP-100 (Kurabo)	2 mL	300 µL	−80°C
J-MICC (Kyushu University KOPS 2)	EDTA-K2	6	4°C, 16 h	-	1500 × g, 10 min, RT	-	−80°C	Whole blood	Sumitest EX-R&D kit (Genome Science Laboratories)	300 µL	200 µL	−80°C
J-MICC (Kyushu University prevention medicine)	EDTA-K2	6	4°C, 2 h	≤6 h	1500 × g, 10 min, RT	-	−80°C	Whole blood	NA-3000 (Kurabo)	2 mL	500 µL	−80°C
J-MICC (Kyushu University prevention medicine)	EDTA-K2	6	4°C, 2 h	≤6 h	1500 × g, 10 min, RT	-	−80°C	Whole blood	Puregene Blood Core Kit B (Qiagen)	2 mL	500 µL	−80°C
J-MICC (Aichi Cancer Center)	EDTA-2Na	7	On ice, 5 min	≤3 h	1710 × g, 10 min, 4°C	BC (Manual)	−80°C	Buffy coat	QIAamp DNA Blood Midi Kit (Qiagen)	200 µL	200 µL	−30°C
J-MICC (Nagoya University 1)	EDTA-2Na	7	4°C	≤3 h	1200 × g, 10 min, 4°C	BC (Manual)	−80°C	Buffy coat	MagAttract DNA Blood Midi M48 Kit (Qiagen)	150 µL	200 µL	−80°C
J-MICC (Nagoya University 2)	EDTA-2Na	7	-	Immidiately	1998 × g, 10 min, 4°C	BC (Manual)	−80°C	Buffy coat	MagAttract DNA Blood Midi M48 Kit (Qiagen)	150 µL	200 µL	−80°C
*DNA extraction outsourced to three different external company depending on the project period.
