# Supplementary material for: Adjustment of Cell-Type Composition Minimizes Systematic Bias in Blood DNA Methylation Profiles Derived by DNA Collection Protocols
Source: PLoS One. 2016 Jan 22;11(1):e0147519. doi: 10.1371/journal.pone.0147519 (PMC4723336; doi:10.1371/journal.pone.0147519)
Supplement: S2 Table — (XLSX) [file pone.0147519.s011.xlsx]

## Sheet: Table S2
S2 Table. Sample allocation of HM450 array in Experiment 1.
Sample	Individual	Condition	Position	Layout*	Chip ID	Batch
B1	B	Ctrl1	R01C01	Pattern 1	9297962133	Batch 1
B2		Ctrl2	R02C01
B4		4°C-24h	R03C01
C1	C	Ctrl1	R04C01	Pattern 2
C2		Ctrl2	R05C01
C4		4°C-24h	R06C01
E1	E	Ctrl1	R01C02	Pattern 1
E2		Ctrl2	R02C02
E4		4°C-24h	R03C02
F1	F	Ctrl1	R04C02	Pattern 2
F2		Ctrl2	R05C02
F4		4°C-24h	R06C02
G1	G	Ctrl1	R01C01	Pattern 1	9297962139
G2		Ctrl2	R02C01
G4		4°C-24h	R03C01
H1	H	Ctrl1	R04C01	Pattern 2
H2		Ctrl2	R05C01
H4		4°C-24h	R06C01
I1	I	Ctrl1	R01C02	Pattern 1
I2		Ctrl2	R02C02
I4		4°C-24h	R03C02
J1	J	Ctrl1	R04C02	Pattern 2
J2		Ctrl2	R05C02
J4		4°C-24h	R06C02
M1	M	Ctrl1	R01C01	Pattern 1	9298768025
M2		Ctrl2	R02C01
M4		4°C-24h	R03C01
N1	N	Ctrl1	R04C01	Pattern 2
N2		Ctrl2	R05C01
N4		4°C-24h	R06C01
O1	O	Ctrl1	R01C02	Pattern 1
O2		Ctrl2	R02C02
O4		4°C-24h	R03C02
P1	P	Ctrl1	R04C02	Pattern 2
P2		Ctrl2	R05C02
P4		4°C-24h	R06C02
A1	A	Ctrl1	R01C01	Pattern 1	9298768030	Batch 2
A2		Ctrl2	R02C01
A4		4°C-24h	R03C01
D1	D	Ctrl1	R04C01	Pattern 2
D2		Ctrl2	R05C01
D4		4°C-24h	R06C01
K1	K	Ctrl1	R01C02	Pattern 1
K2		Ctrl2	R02C02
K4		4°C-24h	R03C02
L1	L	Ctrl1	R04C02	Pattern 2
L2		Ctrl2	R05C02
L4		4°C-24h	R06C02
*Pattern1 uses row 1 to 3, Pattern2 uses row 4 to 6.
