# Supplementary material for: Adjustment of Cell-Type Composition Minimizes Systematic Bias in Blood DNA Methylation Profiles Derived by DNA Collection Protocols
Source: PLOS journal article supplement (doi:10.1371/journal.pone.0147519), 2016-01-22
Supplement: S9 (10.1371/journal.pone.0147519.s009) [file journal.pone.0147519.s009]

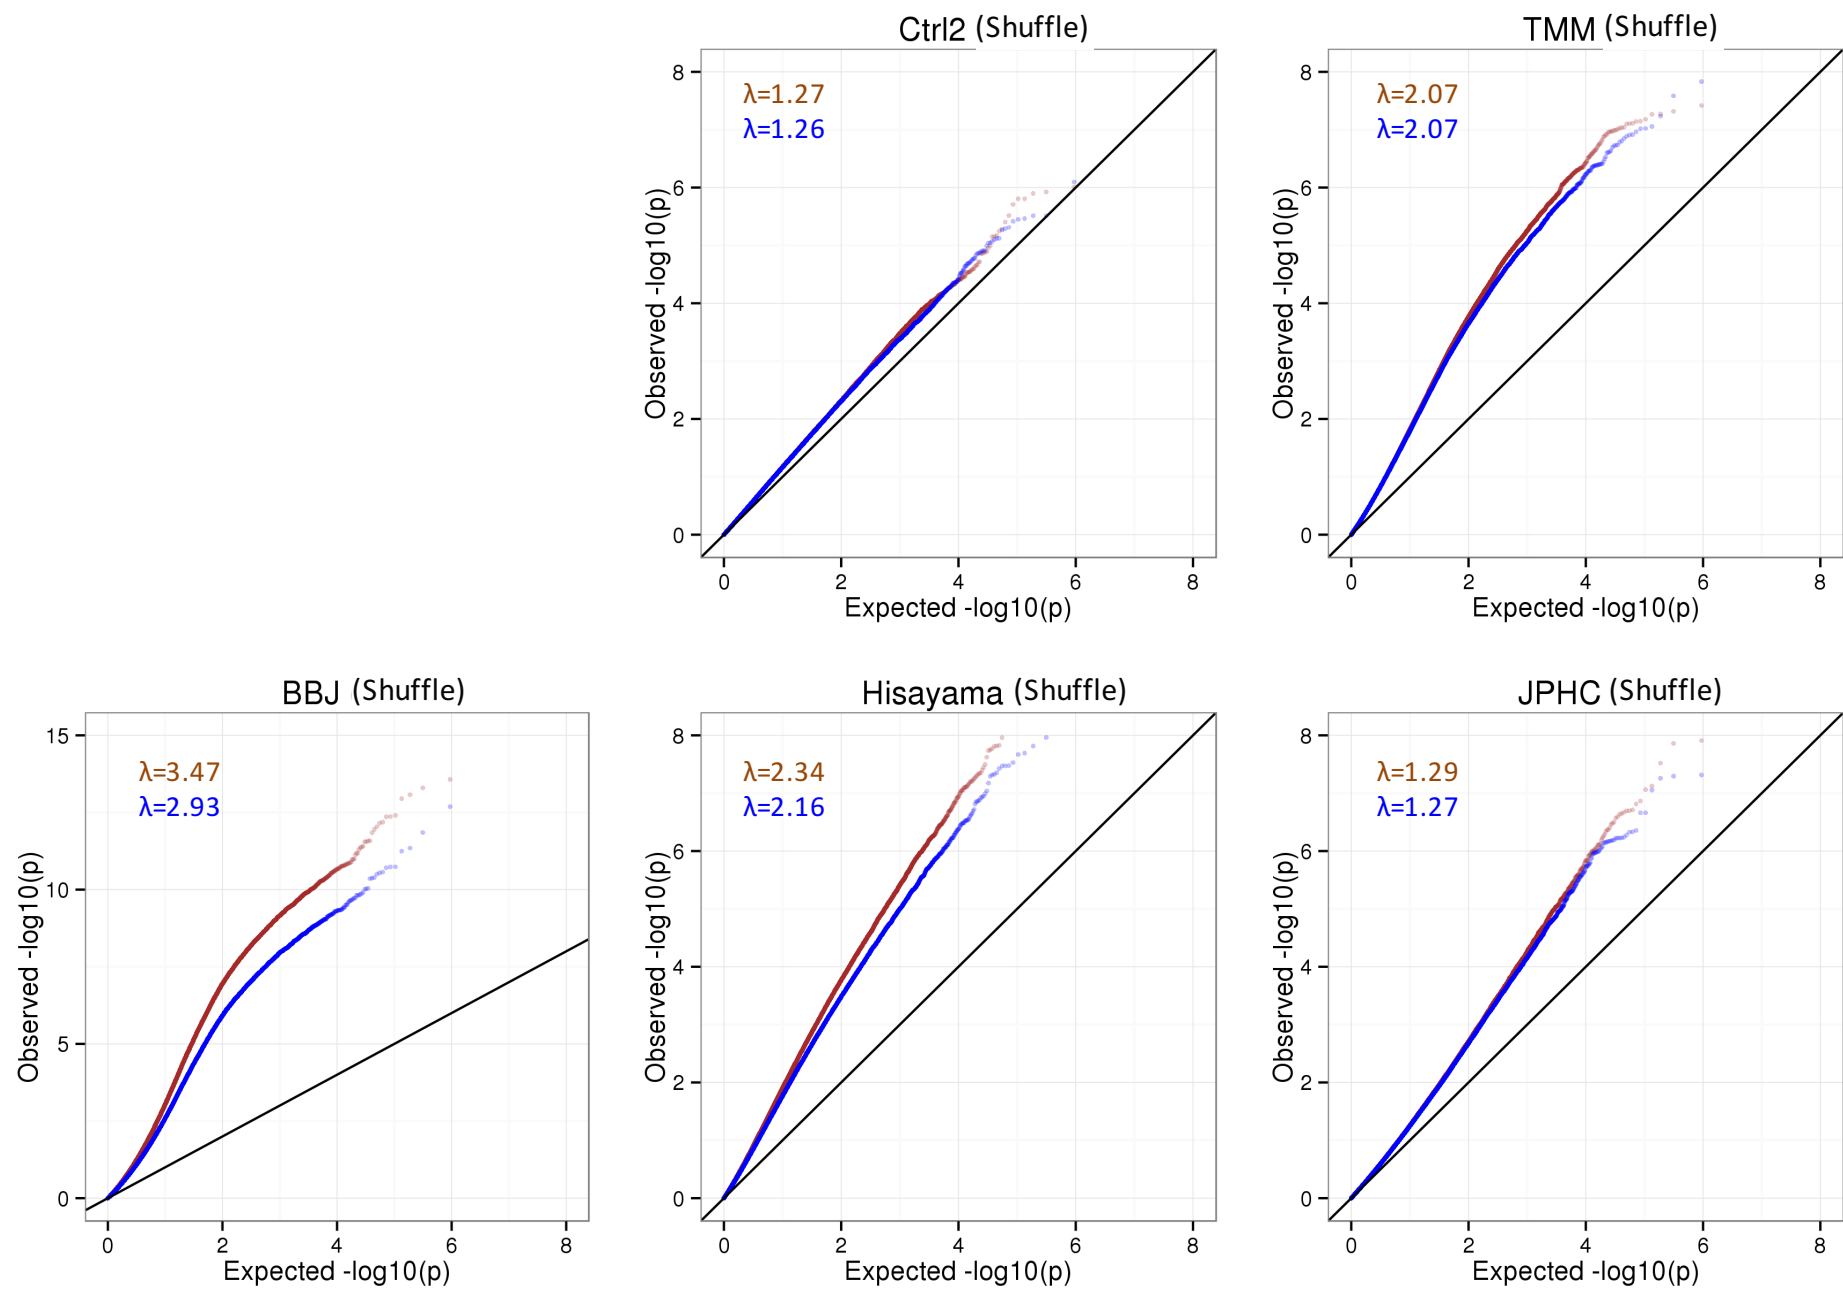

S9 Fig.
